# Supplementary material for: Identification of Catechol as a New Marker for Detecting Propolis Adulteration
Source: MDPI journal article supplement (doi:10.3390/molecules190710208), 2014-07-14

## Supplementary File

**Figure S1.** The negative ions ESI-MS profile of catechol.

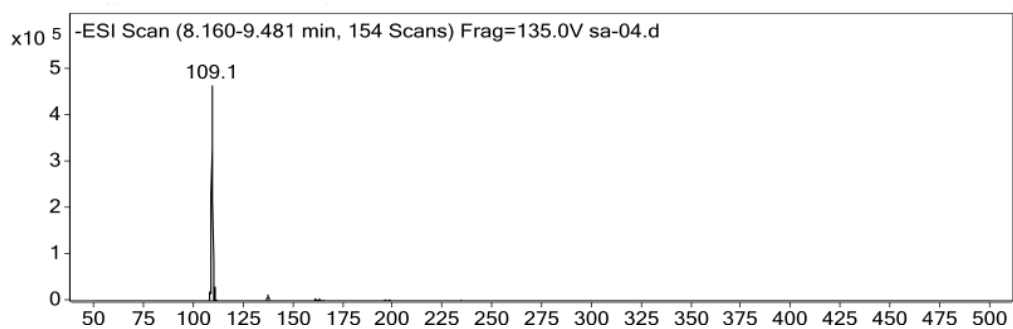

**Figure S2.** The  $^1\text{H}$ -NMR profile of catechol (The original profile).

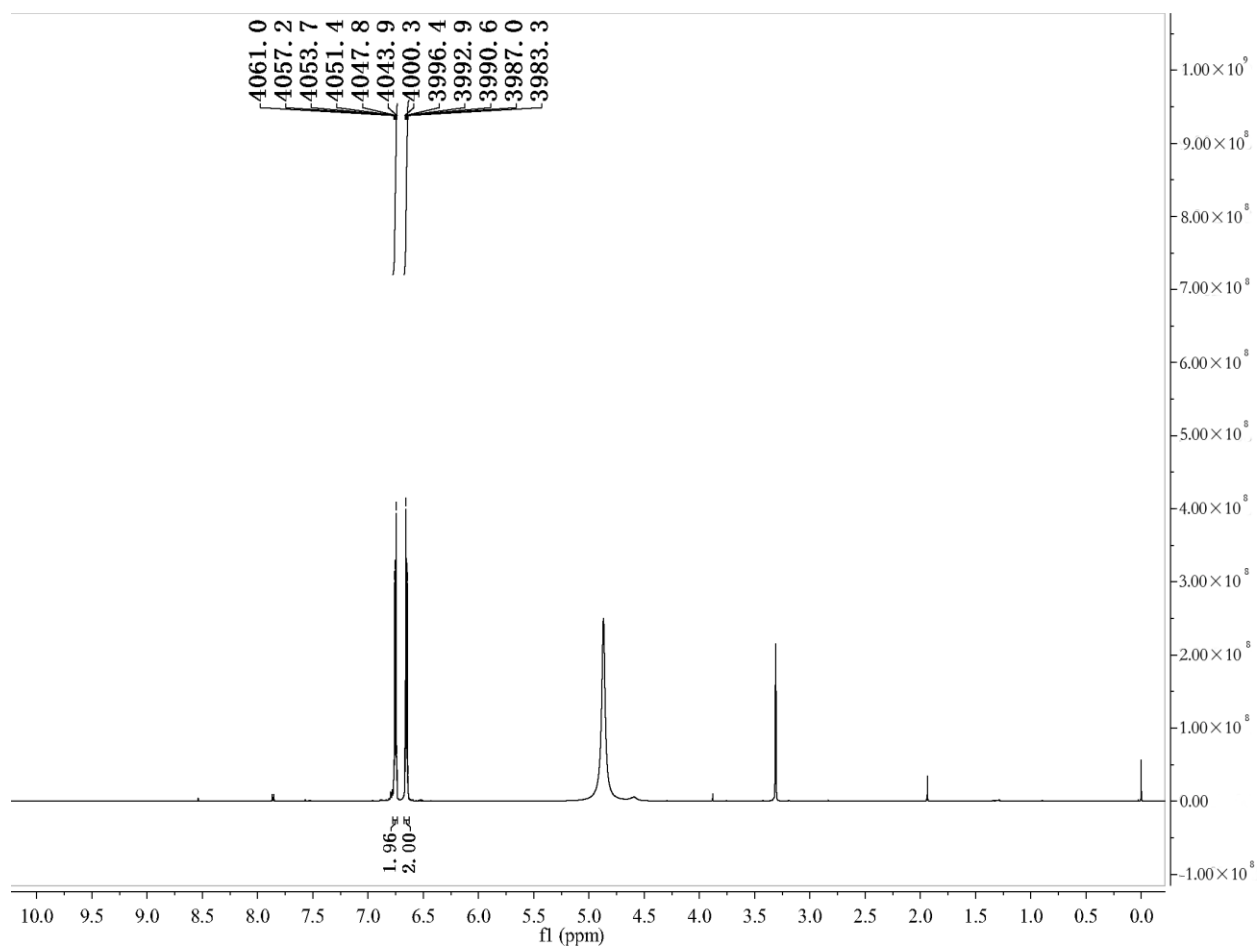

**Figure S3.** The  $^1\text{H}$ -NMR profile of catechol (The enlarged profile of Figure S2).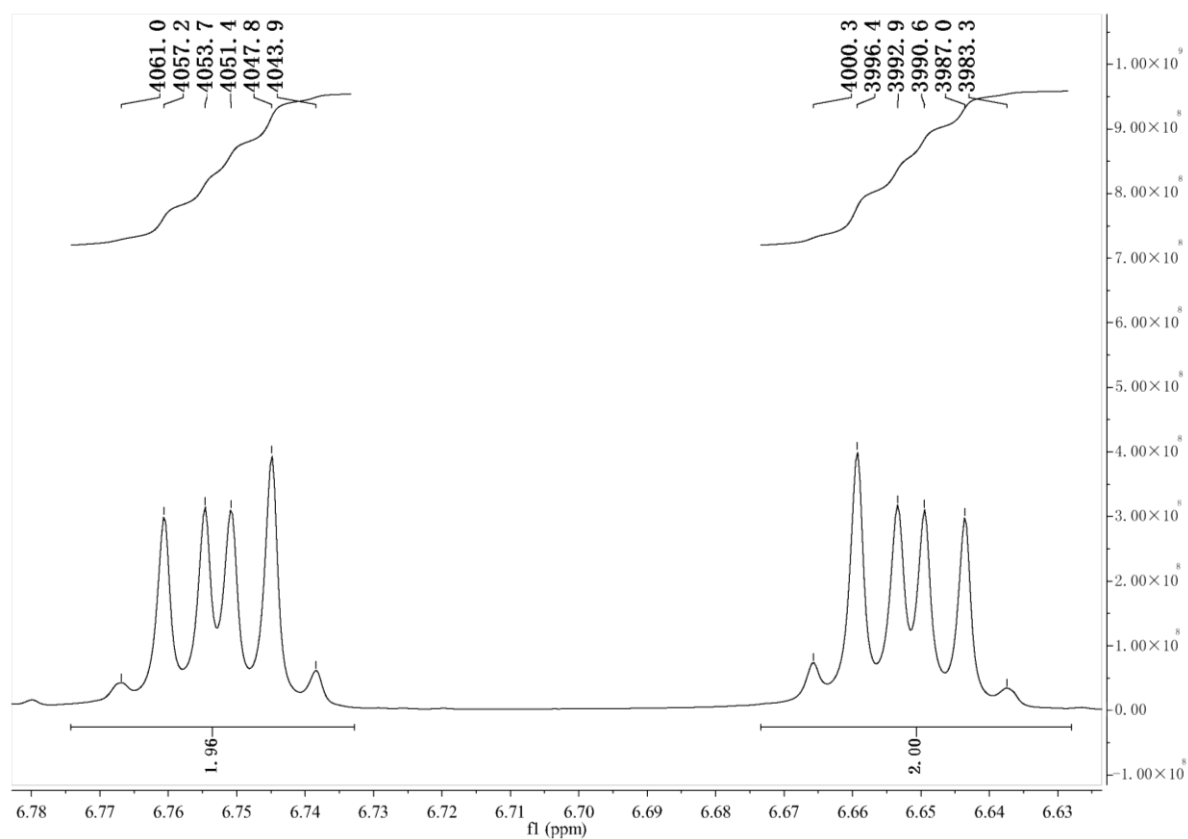**Figure S4.** The  $^{13}\text{C}$ -NMR profile of catechol.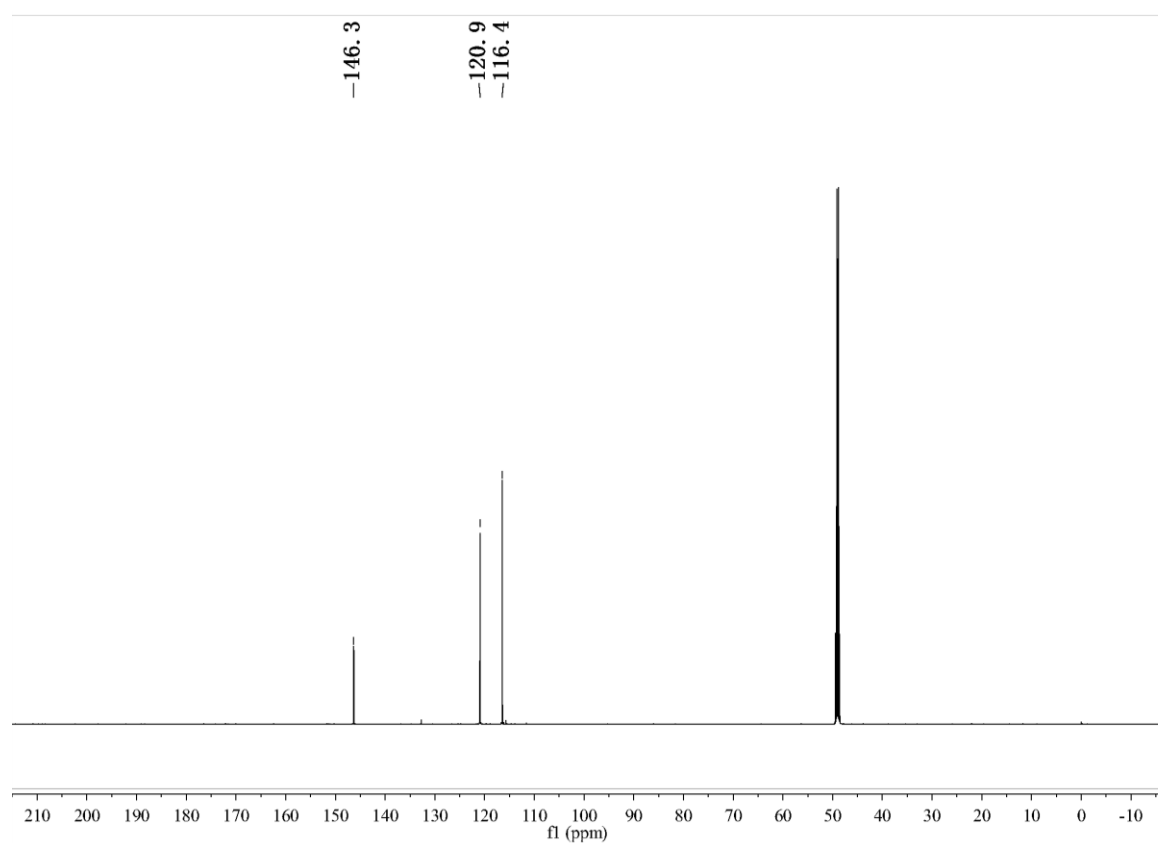

Supplement: s1 [file s1]
